# Supplementary material
Source: publisher site journal article supplement (https://www.dovepress.com/article/246328)
Supplement: Supplementary file 1 [file get_supplementary_file.php]

## Data Supplement

Table S1 List of TNF- $\alpha$  inhibitors in this study

| TNF- $\alpha$ inhibitor | Brand name drug       | Year of introduction in Japan |
|-------------------------|-----------------------|-------------------------------|
| Infliximab              | Remicade <sup>®</sup> | 2002                          |
| Etanercept              | Enbrel <sup>®</sup>   | 2005                          |
| Adalimumab              | Humira <sup>®</sup>   | 2008                          |
| Golimumab               | Simponi <sup>®</sup>  | 2011                          |
| Certolizumab pegol      | Cimzia <sup>®</sup>   | 2013                          |

TNF, tumor necrosis factor.

Adalimumab was used in the market as Humia<sup>®</sup> (40 mg/1.8mL) between 2008 and 2017, and has been used as Humira<sup>®</sup> (40 mg/0.4 mL) since 2016.
